# Supplementary material
Source: publisher figshare collection journal article supplement (https://tandf.figshare.com/articles/dataset/_/6280799)

**Supplemental material 14: cuboid comparative**

Right cuboids of early Cainozoic carnivorous eutherians in (top to bottom) dorsal, ventral, lateral, and medial views. **A**, viverravid *Didymictis protenus* [USGS 27585 (top three images) and USGS 21835 (bottom image)], **B**, ‘miacid’ *Vulpavus australis* (USGS 5025), **C**, hyaenodontid *Prototomus martis* (USNM 509700), **D**, oxyaenid *Oxyaena* sp. (USNM 16485), **E**, machaeroidine (CM 2386).


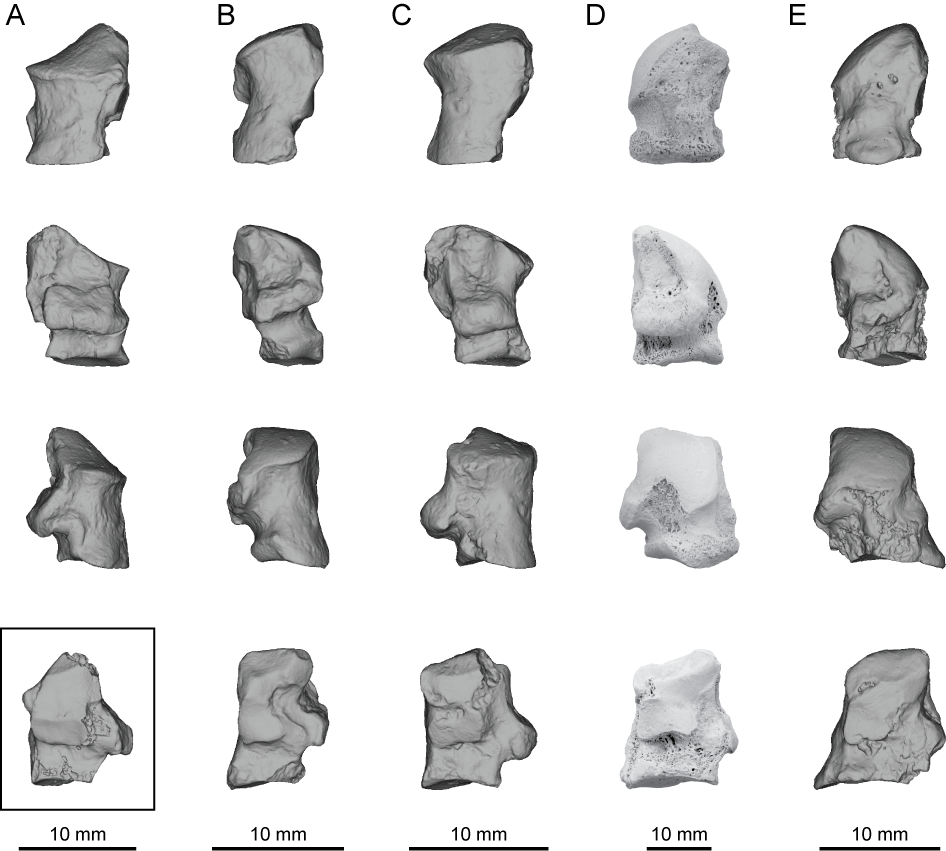

Supplement: Supplementary file 1 [file 1]
